# Supplementary material for: Use of Early Clinical Trial Data to Support Thorough QT Study Waiver for Upadacitinib and Utility of Food Effect to Demonstrate ECG Assay Sensitivity
Source: PubMed Central journal article supplement (PMC5946993; doi:10.1002/cpt.804), 2017-09-25

**Supplemental Figure 1. Diagnostic Plots for the Goodness of Fit of the Exposure-Response Model Characterizing the Effect of Upadacitinib on  $\Delta$ QTcF**

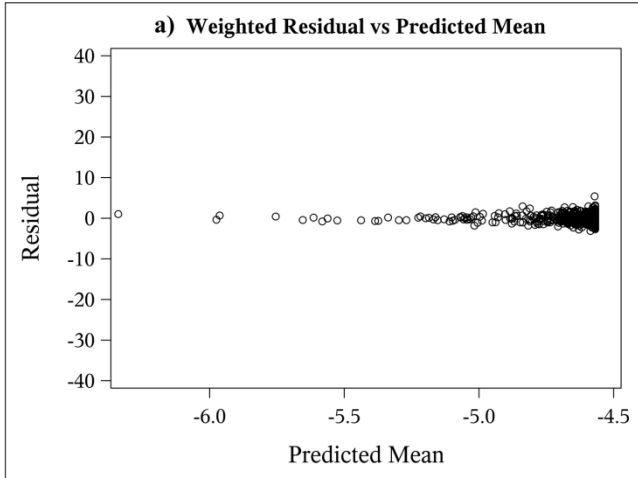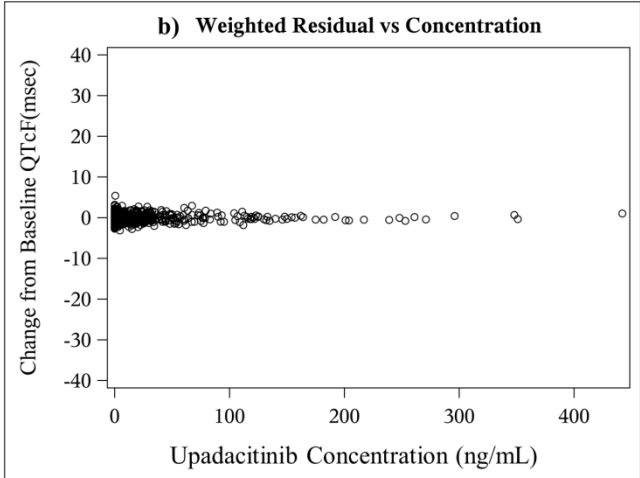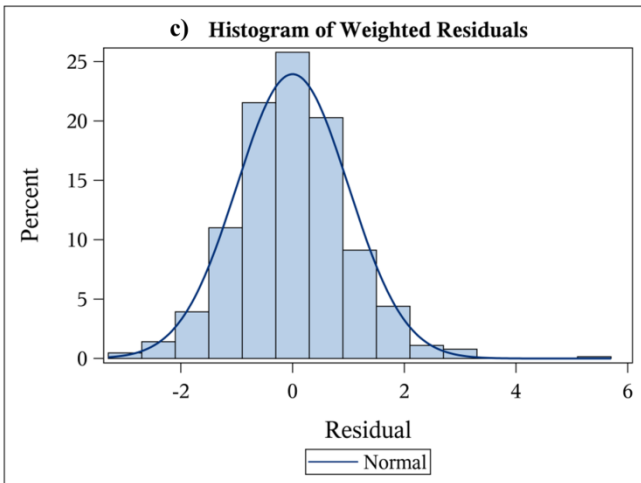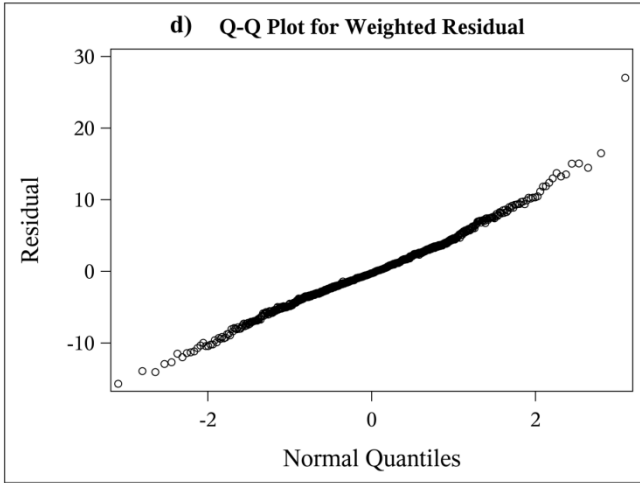

Supplement: CPT-103-836-s001.pdf [file CPT-103-836-s001.pdf]
