# Supplementary material for: Use of Early Clinical Trial Data to Support Thorough QT Study Waiver for Upadacitinib and Utility of Food Effect to Demonstrate ECG Assay Sensitivity
Source: PubMed Central journal article supplement (PMC5946993; doi:10.1002/cpt.804), 2017-09-25
Supplement: CPT-103-836-s003.pdf [file CPT-103-836-s003.pdf]

## Supplemental Table. Number of Subjects Included in the Exposure-Response

### Analysis by Study and Regimen

| <b>Study</b>                                                                   | <b>Regimen</b>                      | <b>Number of subjects</b> |
|--------------------------------------------------------------------------------|-------------------------------------|---------------------------|
| Study 1<br>(Single ascending dose<br>substudy)                                 | 1 mg upadacitinib (fasting)         | 6                         |
|                                                                                | 3 mg upadacitinib (fasting)         | 6                         |
|                                                                                | 6 mg upadacitinib (fasting)         | 5 <sup>b</sup>            |
|                                                                                | 12 mg upadacitinib (fasting)        | 6                         |
|                                                                                | 24 mg upadacitinib (fasting)        | 5 <sup>b</sup>            |
|                                                                                | 36 mg upadacitinib (fasting)        | 5 <sup>b</sup>            |
|                                                                                | 48 mg upadacitinib (fasting)        | 6                         |
|                                                                                | Placebo (fasting)                   | 14                        |
| Study 1<br>(Single-dose food effect and<br>ketoconazole substudy) <sup>a</sup> | 3 mg upadacitinib                   | 12                        |
| Study 2<br>(Part 1 multiple-dose study)                                        | 3 mg upadacitinib BID (nonfasting)  | 8                         |
|                                                                                | 6 mg upadacitinib BID (nonfasting)  | 8                         |
|                                                                                | 12 mg upadacitinib BID (nonfasting) | 8                         |
|                                                                                | 24 mg upadacitinib BID (nonfasting) | 8                         |
|                                                                                | Placebo (nonfasting)                | 12                        |
|                                                                                |                                     | Total = 109               |

a. Conducted in 12 subjects using a 3-period cross-over design. Data from the period in which subjects received ketoconazole were not included in the analyses.

b. Total number enrolled in each of the noted dose groups was 6. One subject enrolled in each of these dose groups had a missing baseline ECG and was not included in the analyses.
